# Supplementary material
Source: PubMed Central journal article supplement (PMC314166)
Supplement: pnas_101_1_221__8.pdf [file pnas_101_1_221__8.pdf]

**A****BL Image**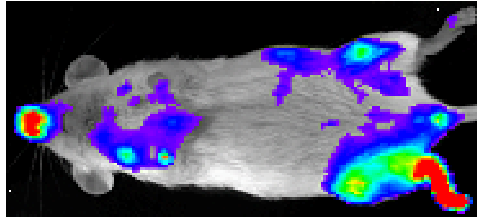**B**

|             | <u>Frequency of GFP<sup>+</sup> Mac-1<sup>+</sup>Gr-1<sup>+</sup> cells</u> |                             | <u>Frequency of GFP<sup>+</sup> KTLS HSC</u> |                             |
|-------------|-----------------------------------------------------------------------------|-----------------------------|----------------------------------------------|-----------------------------|
|             | % of live cells                                                             | % of GFP <sup>+</sup> cells | % of live cells                              | % of GFP <sup>+</sup> cells |
| Blood       | 3.62                                                                        | 51.6                        | 0.001                                        | 0.018                       |
| Spleen      | 1.9                                                                         | 44.8                        | 0.015                                        | 0.29                        |
| Right femur | 40.3                                                                        | 59.9                        | 0.077                                        | 0.11                        |
| Left femur  | 50                                                                          | 84                          | 0.084                                        | 0.14                        |
| Left tibia  | 18.8                                                                        | 73.3                        | 0.005                                        | 0.016                       |
