# Supplementary material
Source: PubMed Central journal article supplement (PMC314166)

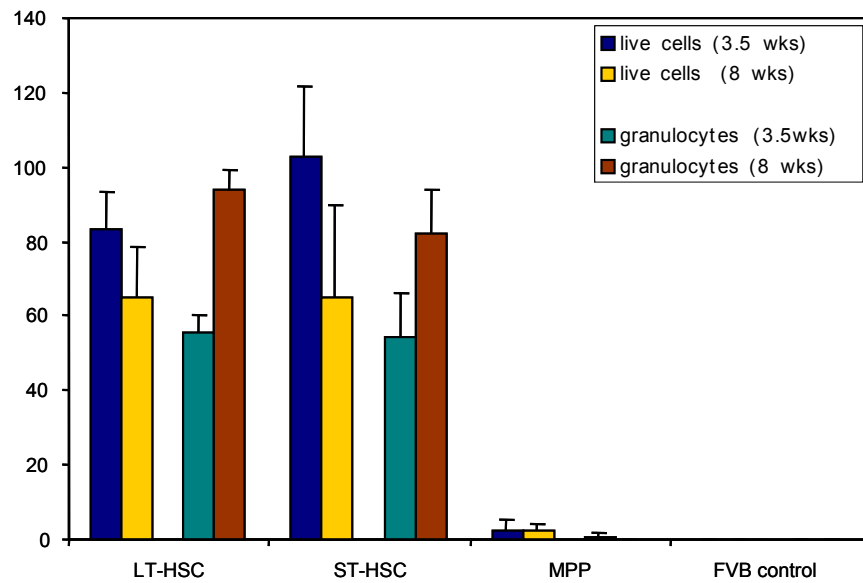

Supplement: pnas_101_1_221__10.pdf [file pnas_101_1_221__10.pdf]

**A**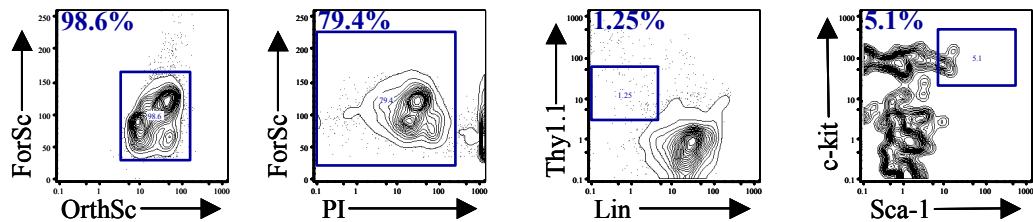**B**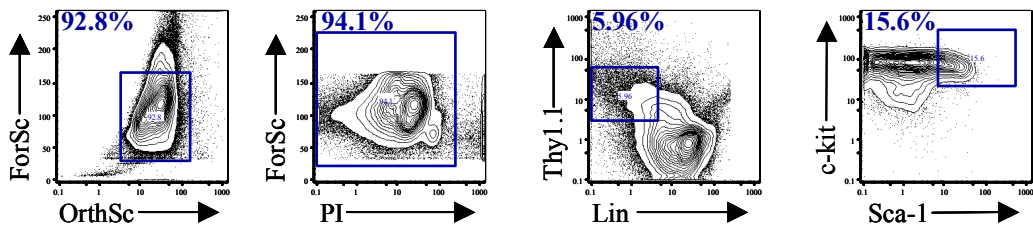**C**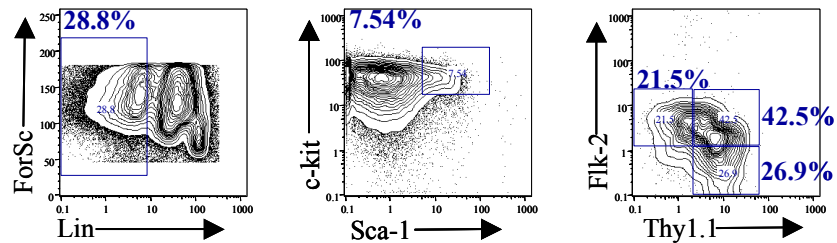

Supplement: pnas_101_1_221__2.pdf [file pnas_101_1_221__2.pdf]

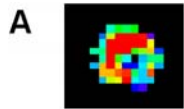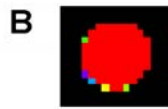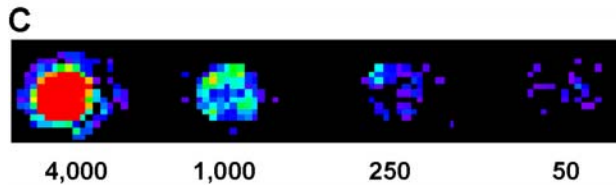

Supplement: pnas_101_1_221__4.pdf [file pnas_101_1_221__4.pdf]

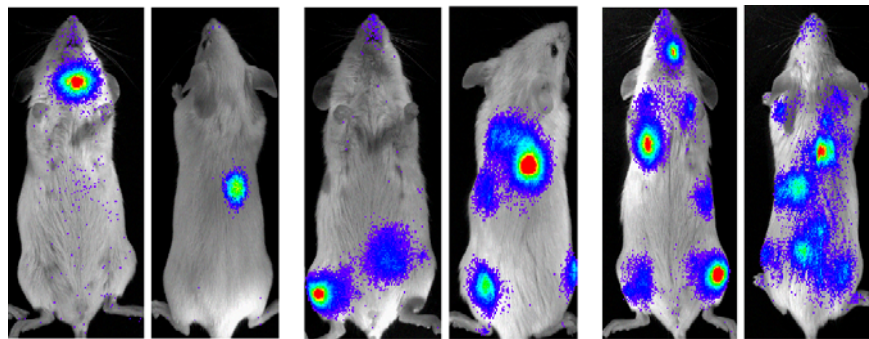

10 HSC

50 HSC

250 HSC

Supplement: pnas_101_1_221__6.pdf [file pnas_101_1_221__6.pdf]
